# Supplementary material for: LPS1, Encoding Iron-Sulfur Subunit SDH2-1 of Succinate Dehydrogenase, Affects Leaf Senescence and Grain Yield in Rice
Source: PubMed Central journal article supplement (PMC7795075; doi:10.3390/ijms22010157), 2020-12-25
Supplement: ijms-22-00157-s001.pdf [file ijms-22-00157-s001.pdf]

## Supplementary Material

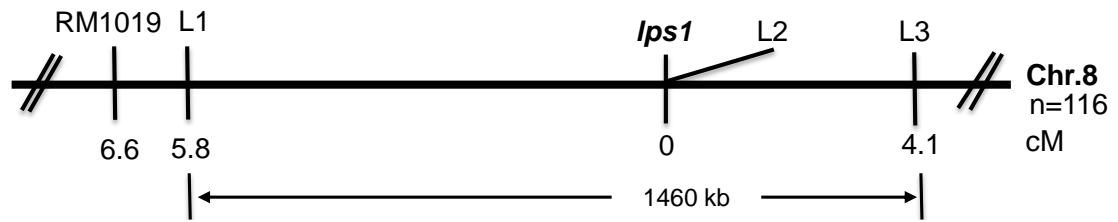

**Figure S1** Preliminary mapping of the *lps1* locus.

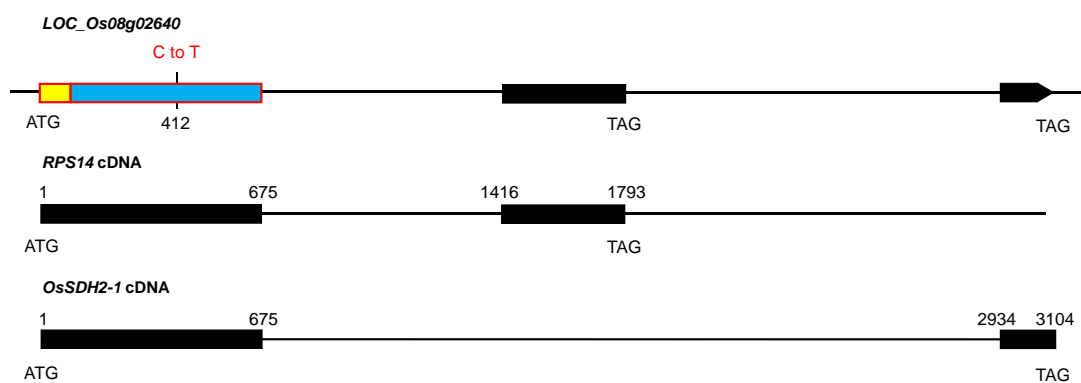

**Figure S2** Schematic representation of *LOC\_Os08g02640* gene, *RPS14* cDNA and *OsSDH2-1* cDNA. The substitution (C to T) happened at position 412 in genome sequence of *LOC\_Os08g02640* gene. Red box shows the common region of *OsSDH2-1* and *RPS14* cDNAs, in which yellow block indicates the sequence encoding mitochondrial signal peptide and blue block indicates the sequence encoding a peptide specifically belonged to functional SDH2.

|          |                                                                                                     |     |
|----------|-----------------------------------------------------------------------------------------------------|-----|
| OsSDH2-1 | MAAAALRRSPAARALLSPALSSRLVASKPHSSSPAPP.PPP.SKA.....GANTKTFSTLYRWDPDSPSTKPHLKDVKVLDSDCGPMVLDLALKIK    | 89  |
| TaSDH2   | MAAAALRRSPAARALLSPALSSRLVASKPHSSSPAPP.PPS.SKP.....AS.TKTFSTLYRWDPDSPSTKPHLKDVKVLDSDCGPMVLDLALKIK    | 88  |
| SbSDH2   | MAAAALRRSSAARTLLSPALSSRLVASKPHSSSPAPP.PPPPAKA.....AANTKTFSTLYRWDPDSPSTKPHLKDVKVLDSDCGPMVLDLALKIK    | 91  |
| ZmSDH2   | MAAAALRRSPAARALLSPALSSRLVASKPHSSSPAPP.PPE.AKG.....ASSTKTFSTLYRWDPDSPSTKPHLKDVKVLDSDCGPMVLDLALKIK    | 89  |
| AtSDH2-1 | .MASGLIGR.LVGTKPSKLATAARLIPARWTSTGAEAEKASSGGGR.....GSNLKTFQYRWDPDPNG.KPELQYQVLDLKDCCGPMVLDLALKIK    | 89  |
| AtSDH2-2 | .MAFGLIGR.VVGTSSRLSTAARLIPARWTSTGSEAOQKASTGGG.....GASLKTFQYRWDPDPNG.KPELQYQVLDLKDCCGPMVLDLALKIK     | 88  |
| NtSDH2   | .MATGLIRR.AISRVHSS.PAAKLVARAHASEAKAH.QSESKQQ.....PNLKSFOYRWSPDPNG.KPELKEKIDLKECCGPMVLDLALKIK        | 84  |
| SfSDH2-2 | .MATSLIRR.AISRVQSSA.PAARLLVARAHASDQAO.QVESK.....PNLKSFOYRWDPDPNG.KPELKEKIDLKECCGPMVLDLALKIK         | 83  |
| XaSDH2   | .....MAEFTLPKNSTIGKGYHPAG.....AKNVRTFKIYRWDPD.DDSNERTDINEVDLDAACGPMVLDLALKIK                        | 66  |
| CrSDH2   | MLPSLLTNARRGAQALQPGFLSAFISTTSSELNAAATATASKPAPSRPPLAKPPLYKEFOYRWDPD.SDEPKYASQVLDINNCGPMVLDLALKIK     | 97  |
| ScSDH2   | MLNVLRR.RK.....AFCLVTKKGMATATTAATH.....TPRLKTFKVIYRWDPDPSAKPHLQSYQVLDINNCGPMVLDLALKIK               | 74  |
| OsSDH2-1 | NEQDPSLTFRRSCREGICGSCAMINDGNGLAQLTKISSASS.ASTISPLPHMFVVKDLVDMTNFYNQKSVBWLKRRDPPPOGKFTPTKADRA        | 186 |
| TaSDH2   | NEQDPSLTFRRSCREGICGSCAMINDGNGLAQLTKISSAAGASTISPLPHMFVVKDLVDMTNFYNQKSVBWLKRRDPPSAGGKFTPTKADRA        | 186 |
| SbSDH2   | NEQDPSLTFRRSCREGICGSCAMINDGNGLAQLTKISSASS.ASTVSPHMFVVKDLVDMTNFYSYKSVBWLKRRDPPPOGKFTPTKADRA          | 188 |
| ZmSDH2   | NEQDPSLTFRRSCREGICGSCAMINDGNGLAQLTKISSASS.ASTVSPHMFVVKDLVDMTNFYNQKSVBWLKRRDPPPOGKFTPTKADRA          | 186 |
| AtSDH2-1 | NEQDPSLTFRRSCREGICGSCAMINDGNGLAQLTKIQDEAS.ETTITPLPHMFVVKDLVDMTNFYNQKSVBWLKRRTPASVPAKFTPTKADRA       | 186 |
| AtSDH2-2 | NEQDPSLTFRRSCREGICGSCAMINDGNGLAQLTKIESGSK.ETTITPLPHMFVVKDLVDMTNFYNQKSVBWLKRRNPASVPAKFTPTKADRA       | 185 |
| NtSDH2   | NEQDPSLTFRRSCREGICGSCAMINDGNGLAQLTKIDSGA..ESTITPLPHMFVVKDLVDMTNFYNQKSVBWLKRRTEPTTPGKFTPTKADRA       | 180 |
| SfSDH2-2 | NEQDPSLTFRRSCREGICGSCAMINDGNGLAQLTKISSDS..ESTITPLPHMFVVKDLVDMTNFYNQKSVBWLKRRTPAPTTPGKFTPTKADRA      | 179 |
| XaSDH2   | NEQDPSLTFRRSCREGICGSCAMINDGNTLACTKAIADCGKREVPYPLPHMFVVKDLVDMTNFYNQKSVBWLKRRTPAPTTPGKFTPTKADRA       | 163 |
| CrSDH2   | DEQDQTLTFRRSCREGICGSCAMINDGNTLACTCKVNRDPGHVGVKAPLPHMFVVKDLVDMTNFYNQKSVBWLKRRTPAPTTPGKFTPTKADRA      | 193 |
| ScSDH2   | DEQDSTLTFRRSCREGICGSCAMINDGNTLACTCKIDQNESKQLKIYPLPHMFVVKDLVDMTNFYNQKSVBWLKRRTPAPTTPGKFTPTKADRA      | 171 |
| OsSDH2-1 | KLDGMVECILCACCCSTSCPSYWWNPPEYLGPAALLHANRWIQDSRDQFTKBRLLDSINDEFKLYRCHITINCTHACPKGLNPAKQIDTIRKLOLEA.. | 281 |
| TaSDH2   | KLDGMVECILCACCCSTSCPSYWWNPPEYLGPAALLHANRWIQDSRDEFKBRLLDSINDEFKLYRCHITINCTHACPKGLNPAKQIDTIRKLOLEA..  | 281 |
| SbSDH2   | KLDGMVECILCACCCSTSCPSYWWNPPEYLGPAALLHANRWIQDSRDQFTKBRLLDSINDEFKLYRCHITINCTHACPKGLNPAKQIDTIRKLOLEA.. | 283 |
| ZmSDH2   | KLDGMVECILCACCCSTSCPSYWWNPPEYLGPAALLHANRWIQDSRDQFTKBRLLDAINDEFKLYRCHITINCTHACPKGLNPAKQIDTIRKLOLEA.. | 281 |
| AtSDH2-1 | KLDGMVECILCACCCSTSCPSYWWNPPEYLGPAALLHANRWIQDSRDEYTKBRLEAIDDEFKLYRCHITINCARACPKGLNPAKQIDTIRKLOLEA..  | 279 |
| AtSDH2-2 | KLDGMVECILCACCCSTSCPSYWWNPPEYLGPAALLHANRWIQDSRDEYTKBRLEAIDDEFKLYRCHITINCARACPKGLNPAKQIDTIRKLOLEA..  | 280 |
| NtSDH2   | KLDGMVECILCACCCSTSCPSYWWNPPEYLGPAALLHANRWIQDSRDEYTKBRLEAIDDEFKLYRCHITINCARACPKGLNPAKQIDTIRKLOLEA..  | 275 |
| SfSDH2-2 | KLDGMVECILCACCCSTSCPSYWWNPPEYLGPAALLHANRWIQDSRDEYTKBRLEAIDDEFKLYRCHITINCARACPKGLNPAKQIDTIRKLOLEA..  | 274 |
| XaSDH2   | KLDGMVECILCACCCSTSCPSYWWNPPEYLGPAALLHANRWIQDSRDEYTKBRLEAIDDEFKLYRCHITINCARACPKGLNPAKQIDTIRKLOLEA..  | 260 |
| CrSDH2   | KLDGMVECILCACCCSTSCPSYWWNPPEYLGPAALLHANRWIQDSRDEYTKBRLEAIDDEFKLYRCHITINCARACPKGLNPAKQIDTIRKLOLEA..  | 290 |
| ScSDH2   | KLDGMVECILCACCCSTSCPSYWWNPPEYLGPAALLHANRWIQDSRDEYTKBRLEAIDDEFKLYRCHITINCARACPKGLNPAKQIDTIRKLOLEA..  | 266 |

**Figure S3** Homolog sequences of OsSDH2-1. Black shades indicate the identical residues and gray shades indicate the similar residues ( $\geq 75\%$  identical). The red arrow indicates the mutation site of OsSDH2-1 in the *lps1* mutant, the blue lines indicate the cysteine clusters which were ligands to the iron-sulfur clusters, the red line indicates the mitochondrial signal peptide predicted from TargetP 1.1 Server. Accession numbers for the respective protein sequences are as Fig. 6.

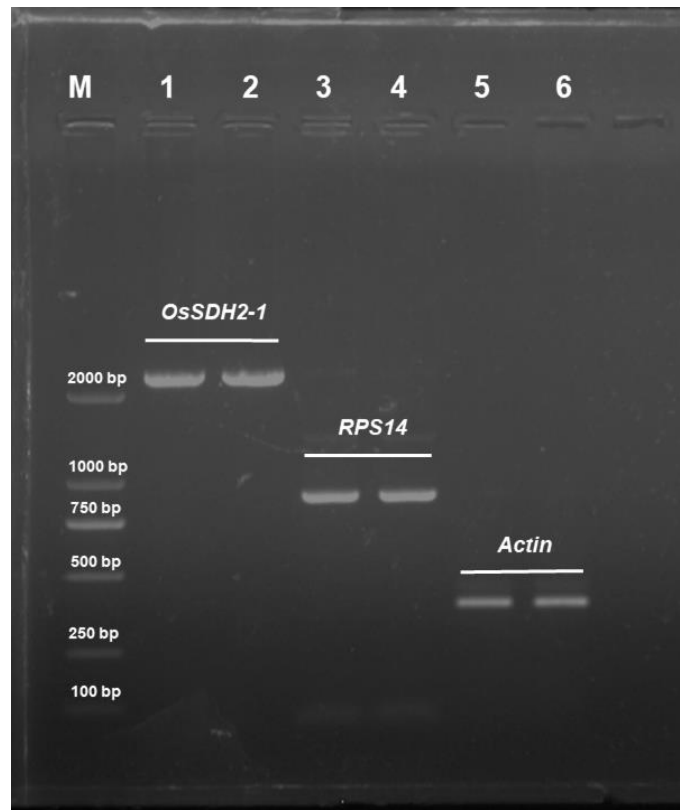

**Figure S4** Detection of PCR amplification efficiency of *OsSDH2-1* and *RPS14* qRT-PCR specific primer in wild-type genomic DNA.

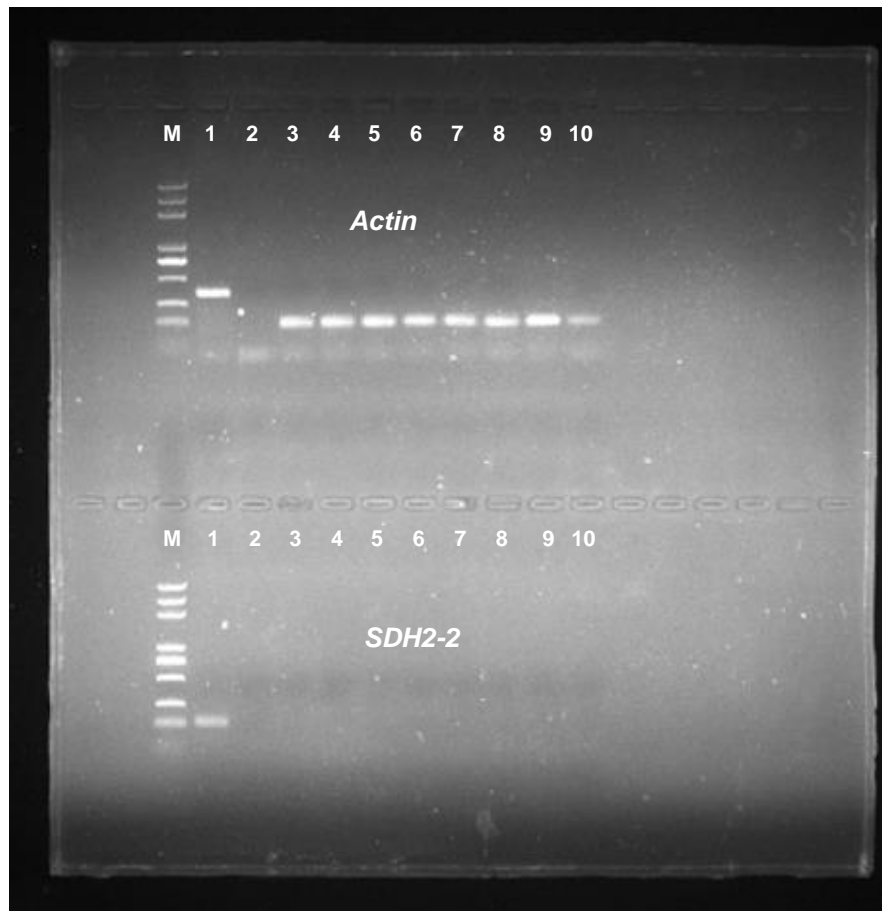

**Figure S5** Detection of *SDH2-2* expression in various organs of wild type. M: DL-5000 marker; 1: positive control (genomic DNA); 2: negative control; 3: seeds after 48-hours imbibition; 4-5: root and leaf at seedling stage; 6-10: root, stem, leaf, young panicle and leaf sheath at booting stage.

**Table S1** Primers used in the study.

| Primers  | Forward primer           | Reverse primer           | References |
|----------|--------------------------|--------------------------|------------|
| RM1019   | GTTTGAACAGTAGGACTTGT     | AGAACATCTCACACTTCTCT     | [43]       |
| L1       | TGAAATCGGGATATGAG        | TACTAGGAGCACGTTGC        |            |
| L2       | CATTCCAACACTAGGCTCA      | TCAATTCTTCGGTCCAC        |            |
| L3       | CGCCATTAGTTCCTCCGTAT     | GCAGCGAAAGCACTGGAA       |            |
| OsSDH2-1 | CATGTACGAGTGCATCCT       | TCCTTAGTGAACCTGGTCA      |            |
| OsSDH2-2 | TCGTGCTCCATGTGCATC       | CCTCACGACGTACATGTG       |            |
| RPS14    | TCTGCGCCTGCTGCTCCA       | GATGTGCATGAACATGTT       |            |
| Osh36    | AACGCATTTGTGGTTGGCTC     | TCAACTTTGGCCGGTGTCTT     | [30]       |
| Osl57    | ACCCTAAAGTAAATGAAGTC     | CCTGCTCTTGCTTGTTA        | [30]       |
| OsWRKY53 | GAGCGACATCGACATCCT       | TTGTGCTTGCCCTCGTAG       | [44]       |
| AOX1b    | CCTGCTCAGTTCATCACCATCA   | GCATAAAACGGAGTGACAATAGC  | [30]       |
| APX1     | AGGTGCCACAAGGAAAGATCTGGT | TCAGCAGGGCTTTGTCCTAGGAA  | [30]       |
| SODB     | TCCGCCGTATAAACTTGATGCCCT | TGGGTTGCCGTTGTTGTATGCTTC | [30]       |
